# Supplementary material
Source: Research Square preprint supplement (doi:10.21203/rs.3.rs-9018654/v1)
Supplement: Supplementary file 1 [file 445d6f2ef2f222c5edc2bd74.docx]

**Circle-Seq Analysis Reveals the Involvement of eccDNAs in Salt Stress Response of Bermudagrass (*Cynodon dactylon*)**

**SUPPORTING INFORMATION**

**Supplementary Figure 1.** Electrophoretic comparison of linear genomic DNA (gDNA) before and after enzymatic digestion.

**Supplementary Figure 2.** Electrophoretic analysis of eccDNA products amplified by Rolling Circle Amplification (RCA).

**Supplementary Table 1.** Statistics of eccDNAs sequencing data of Circle-seq.

**Supplementary Table 2.** Identification of eccDNAs encompassing full-length gene sequences.

**Supplementary Table 3.** Genomic characteristics of the candidate eccDNA selected for validation.

**Supplementary Table 4.** Information on the fluorescently labeled oligonucleotide probe used for FISH.

**Supplementary Figures**

**
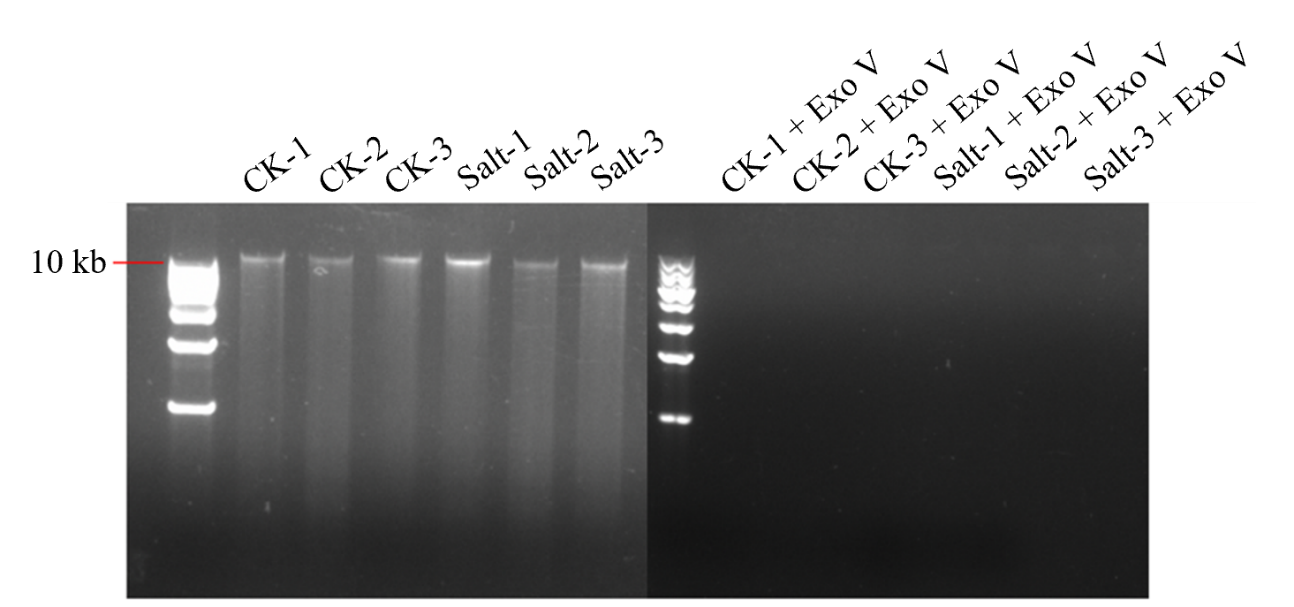
**

**Supplementary Figure 1.** Electrophoretic comparison of linear genomic DNA (gDNA) before and after enzymatic digestion.

**
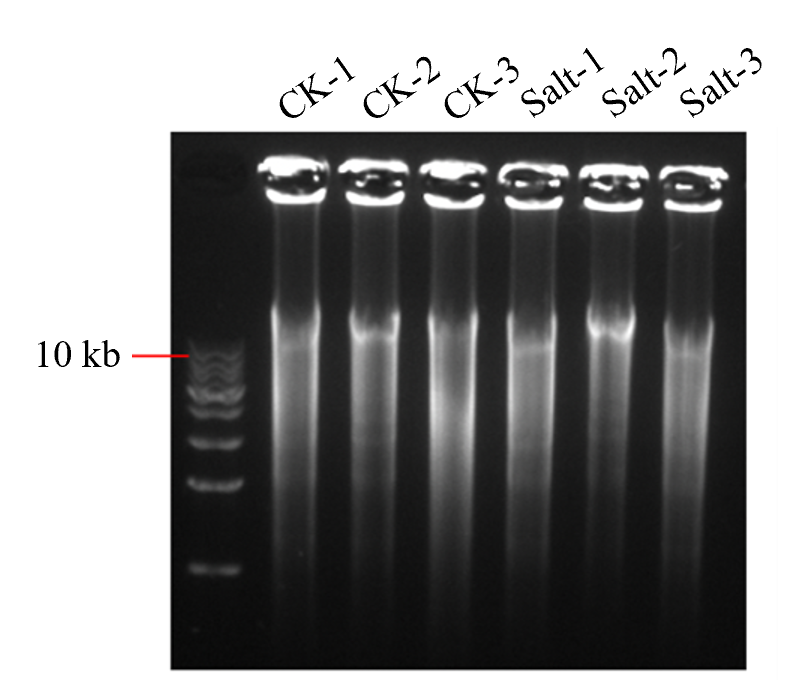
**

**Supplementary Figure 2.** Electrophoretic analysis of eccDNA products amplified by Rolling Circle Amplification (RCA).

**Supplementary Tables**

**Supplementary Table 1** Statistics of eccDNAs sequencing data of Circle-seq.

| **Sample** | | **ReadNum(M)** | **BaseNum(G)** | **Q20(%)** | **Q30(%)** |
| --- | --- | --- | --- | --- | --- |
| CK | CK-1 | 44.67 | 13.4 | 97.53 | 93.98 |
| CK-2 | 39.08 | 11.72 | 97.62 | 94.21 |
| CK-3 | 39.07 | 11.72 | 97.52 | 93.98 |
| Salt | Salt-1 | 37.9 | 11.37 | 97.77 | 94.53 |
| Salt-2 | 45.96 | 13.79 | 97.32 | 93.46 |
| Salt-3 | 42.54 | 12.76 | 97.5 | 93.91 |

**Supplementary Table 2** Identification of eccDNAs encompassing full-length gene sequences.

| **Sample** | **GeneId** | **Seqnames** | **Start** | **End** | **GeneStart** | **GeneEnd** | **Annotation** |
| --- | --- | --- | --- | --- | --- | --- | --- |
| CK | Cd4B2G003200 | 4B2 | 2692995 | 23031038 | 2699239 | 2701392 | Promoter (<=1kb) |
| Cd2B1G027450 | 2B1 | 30122633 | 32880189 | 30124848 | 30125801 | Promoter (<=1kb) |
| Cd6A2G014570 | 6A2 | 21010457 | 23310000 | 21027895 | 21028338 | Promoter (<=1kb) |
| Cd7B1G022360 | 7B1 | 27091519 | 34188877 | 27165830 | 27169018 | Promoter (<=1kb) |
| Salt | Cd5A1G007030 | 5A1 | 15069310 | 15675792 | 15086092 | 15091529 | Promoter (<=1kb) |
| Cd5B2G009730 | 5B2 | 18703805 | 18705272 | 18703963 | 18705093 | Promoter (<=1kb) |
| Cd9A1G003000 | 9A1 | 2693048 | 16822801 | 2693115 | 2695292 | Promoter (<=1kb) |
| Cd2A1G000110 | 2A1 | 175260 | 37363537 | 205737 | 209836 | Promoter (<=1kb) |
| Cd2B2G000300 | 2B2 | 174407 | 12146398 | 254410 | 255399 | Promoter (<=1kb) |
| Cd5A1G002890 | 5A1 | 3848073 | 32875321 | 3861348 | 3862786 | Promoter (<=1kb) |
| Cd7B2G020700 | 7B2 | 23952777 | 24294993 | 24022295 | 24028946 | Promoter (<=1kb) |
| Cd8B2G000010 | 8B2 | 4404 | 34189168 | 21046 | 24701 | Promoter (<=1kb) |
| Cd7B1G009960 | 7B1 | 8811257 | 8813519 | 8812629 | 8813039 | Promoter (<=1kb) |
| Cd9A2G000740 | 9A2 | 1049261 | 34188915 | 1054749 | 1058168 | Promoter (<=1kb) |

**Supplementary Table 3** Genomic characteristics of the candidate eccDNA selected for validation.

| **eccDNA ID** | **Sequence (5'-3')** |
| --- | --- |
| *ecc690* (*Cd6A2G000690*) | GCCATGTCGGCGGCTACATGTTGCACTCGCCGCCATTGGGCA  GGGGAGTCGAGCTGGCTAAGCTGCCTTTTCAGACAGTTTATC  AGGTGCAGTTGCTGCTATTCTTACCAGGAAGA |

**Supplementary Table 4** Information on the fluorescently labeled oligonucleotide probe used for FISH.

| **Probe ID** | **Sequence (5'-3')** |
| --- | --- |
| Probe-*ecc690* | FAM-CAGCTTAGCCAGCTCGACTCCCCTGCCCAATGGCGGCGAGTGCAA |
